# Supplementary material for: The [4Fe4S] Cluster of Yeast DNA Polymerase ε Is Redox Active and Can Undergo DNA-Mediated Signaling
Source: PubMed Central journal article supplement (PMC8499023; doi:10.1021/jacs.1c07150), 2021-09-24
Supplement: ja1c07150_si_001.pdf [file ja1c07150_si_001.pdf]

**Supporting Information for**

**The [4Fe4S] Cluster of Yeast DNA Polymerase  $\epsilon$  is Redox Active and can undergo DNA-mediated Signaling**

Miguel N. Pinto,<sup>1</sup> Josy ter Beek,<sup>2</sup> Levi A. Ekanger,<sup>1,3</sup>  
Erik Johansson,<sup>2\*</sup> and Jacqueline K. Barton<sup>1\*</sup>

<sup>1</sup>*Division of Chemistry and Chemical Engineering,  
California Institute of Technology, Pasadena, CA 91125, USA*

<sup>2</sup>*Department of Medical Biochemistry and Biophysics,  
Umeå University, SE-901 87, Umeå, Sweden*

<sup>3</sup>*Department of Chemistry, The College of New Jersey,  
Ewing, NJ 08628, USA*

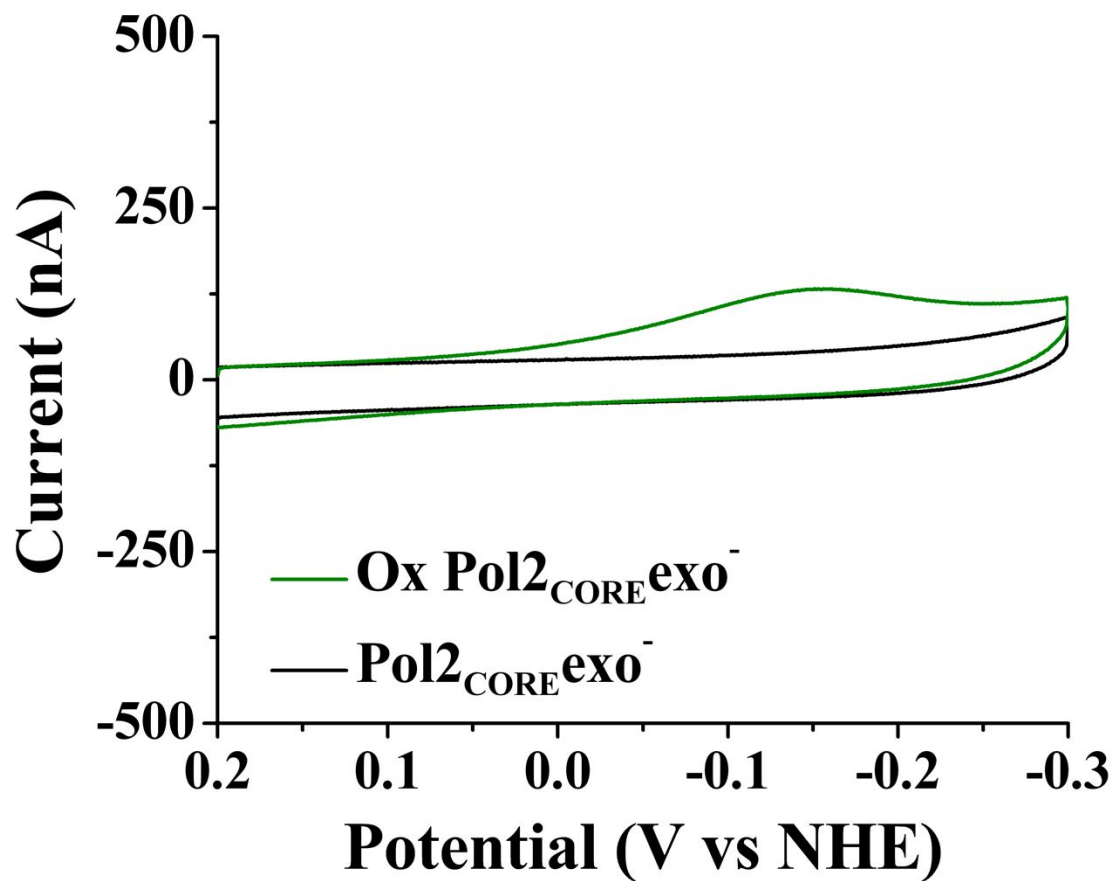

**Figure S1.** CV scans of electrochemically oxidized Pol2<sub>CORE</sub>exo<sup>-</sup> (5  $\mu$ M with respect to [4Fe4S], in 5 mM NaH<sub>2</sub>PO<sub>4</sub>, 50 mM NaCl, pH 7.0) exhibit a large cathodic CV signal centered around -140 mV vs NHE (green trace), and no signal for the electrochemically unaltered protein (black trace). Potential applied ( $E_{\text{appl}}$ ) for bulk oxidation = 412 mV vs NHE for 500 s; CV scan rate = 100 mV s<sup>-1</sup>.

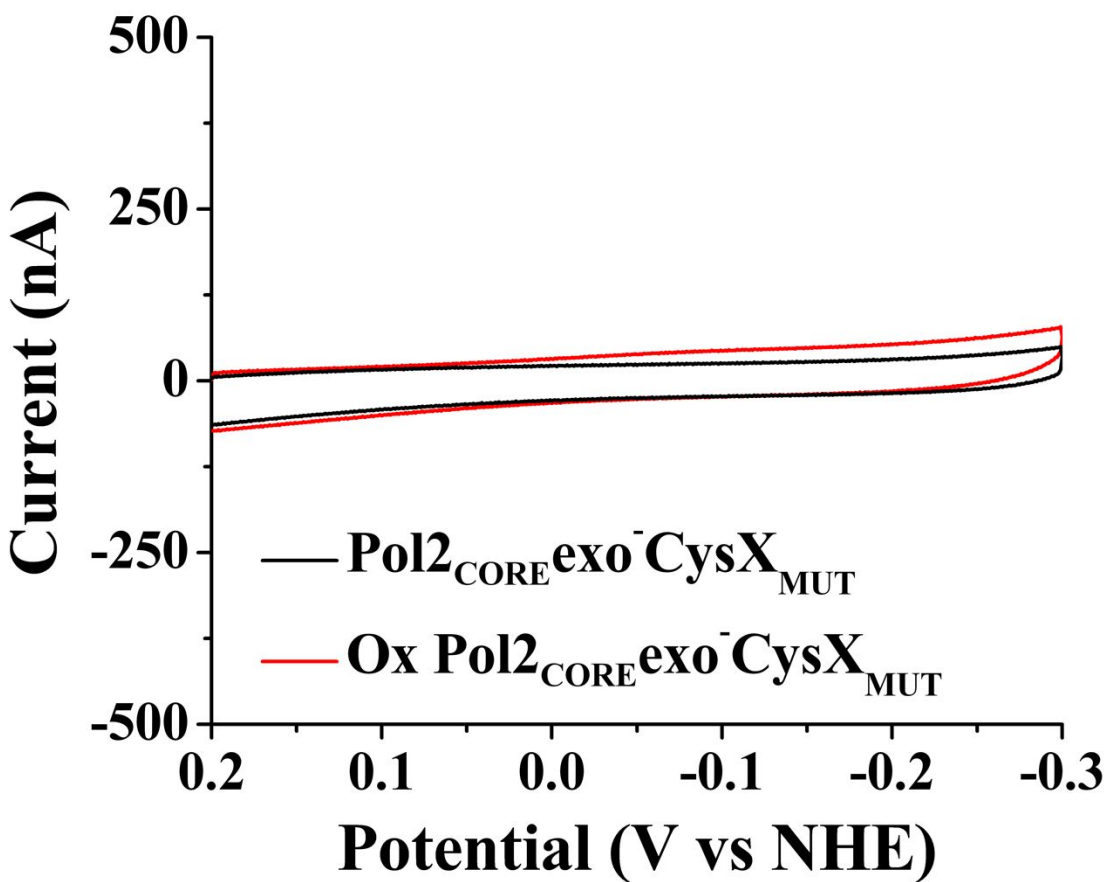

**Figure S2.** CV scans of electrochemically oxidized  $\text{Pol2}_{\text{CORE}}\text{exo}^{-}\text{CysX}_{\text{MUT}}$  (in 5 mM  $\text{NaH}_2\text{PO}_4$ , 50 mM  $\text{NaCl}$ , pH 7.0) does not exhibit a significant cathodic or anodic CV signal (red trace) compared to electrochemically unaltered protein (black trace). Potential applied ( $E_{\text{appl}}$ ) for bulk oxidation = 412 mV vs NHE for 500 s; CV scan rate = 100  $\text{mV s}^{-1}$ .

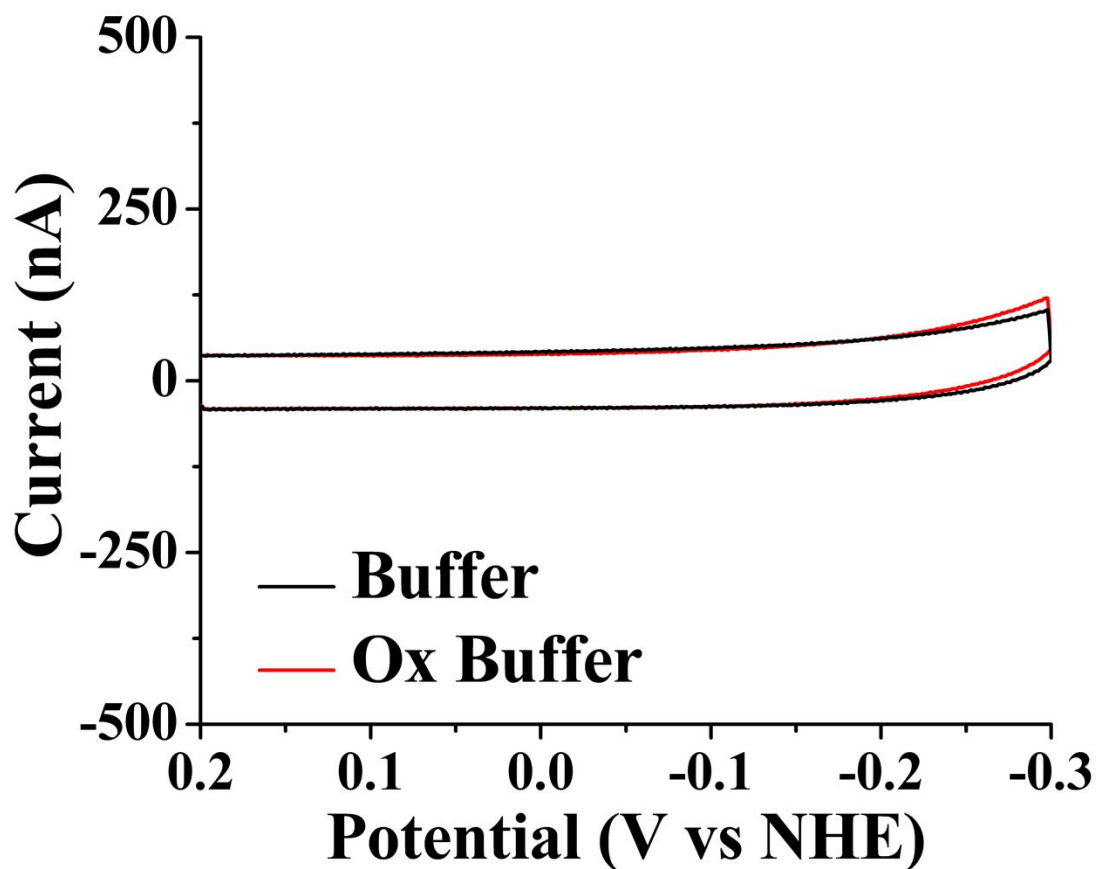

**Figure S3.** CV scans of electrochemically oxidized buffer (5 mM  $\text{NaH}_2\text{PO}_4$ , 50 mM  $\text{NaCl}$ , pH 7.0) does not exhibit a significant cathodic or anodic CV signal (red trace) compared to electrochemically unaltered protein (black trace). Potential applied ( $E_{\text{appl}}$ ) for bulk oxidation = 412 mV vs NHE for 500 s; CV scan rate = 100  $\text{mV s}^{-1}$ .

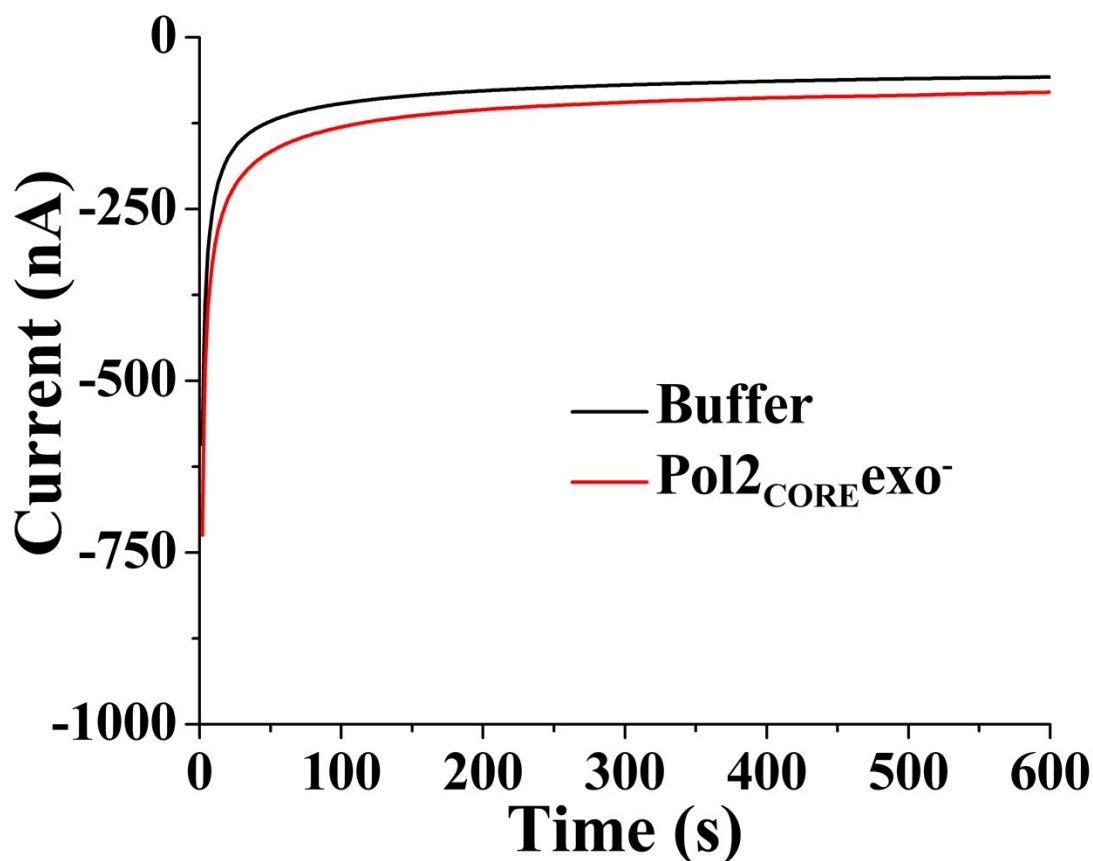

**Figure S4.** Characterization of electrochemically oxidized Pol2<sub>CORE</sub>exo<sup>-</sup>. Electrolysis of 25  $\mu\text{L}$  of 5.0  $\mu\text{M}$  Pol2<sub>CORE</sub>exo<sup>-</sup> at 412 mV for 600 s gave  $\sim 95\%$  oxidation yield. Bulk oxidation yields were calculated<sup>1</sup> by subtracting the amount of charge (reported in Coulombs) obtained from electrolysis of the buffer alone (black trace) from amount of charge obtained from electrolysis of the sample containing Pol2<sub>CORE</sub>exo<sup>-</sup> (red trace). The resulting integrated area was converted to moles of electrons transferred using Faradays constant ( $96,485 \text{ C mol}^{-1}$ ). The obtained moles of electrons transferred equals the moles of oxidized Pol2<sub>CORE</sub>exo<sup>-</sup> because oxidation of the [4Fe4S] cluster is a one-electron redox process. Finally, the bulk oxidation yield was obtained as a percentage by dividing the moles of oxidized [4Fe4S] cluster by the total moles of Pol2<sub>CORE</sub>exo<sup>-</sup> contained in the 25  $\mu\text{L}$  sample. Note: the total moles of Pol2<sub>CORE</sub>exo<sup>-</sup> were obtained using its [4Fe4S] cluster absorbance ( $\epsilon = 17,000 \text{ M}^{-1} \text{ cm}^{-1}$ ).

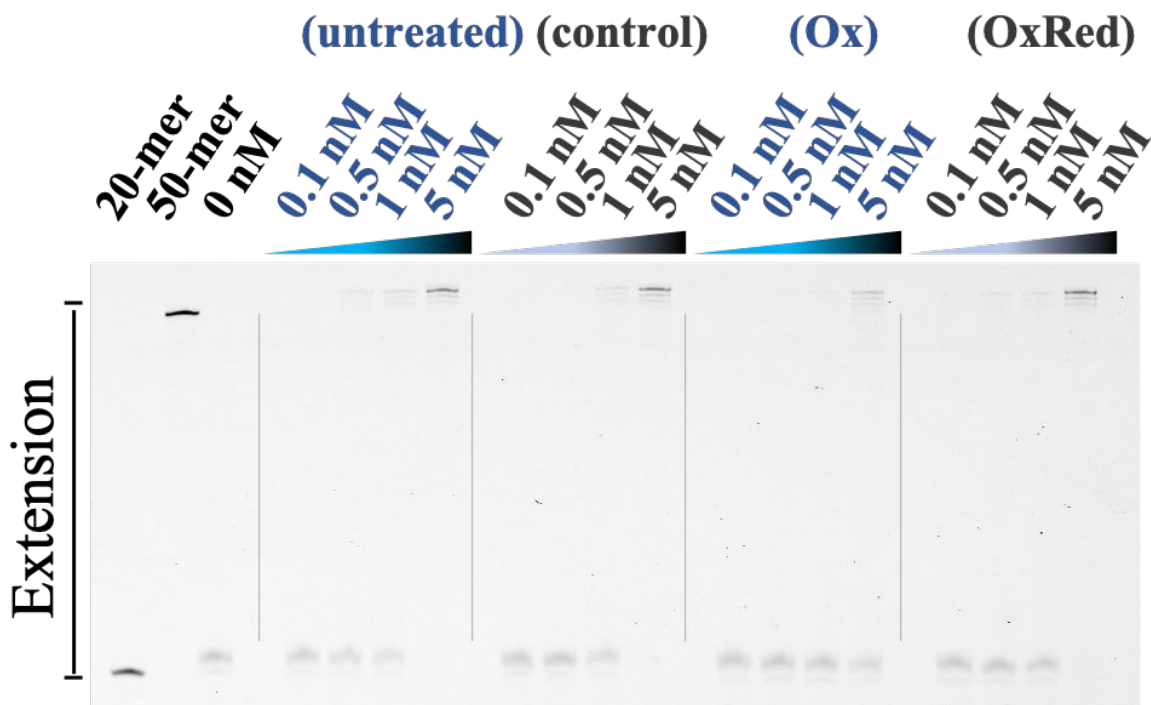

**Figure S5.** Representative example of denaturing PAGE results of Pol2<sub>CORE</sub>EXO<sup>-</sup> primer extension assay upon [4Fe4S] cluster oxidation/reduction. (untreated) activity of untreated Pol2<sub>CORE</sub>EXO<sup>-</sup>; (control) activity of the wild type Pol2<sub>CORE</sub>EXO<sup>-</sup> after incubation on DNA modified electrodes without applied potential; (Ox) activity of Pol2<sub>CORE</sub>EXO<sup>-</sup> after bulk oxidation (600 s, E<sub>appl</sub> = 412 mV vs NHE); (OxRed) activity of Pol2<sub>CORE</sub>EXO<sup>-</sup> after bulk oxidation (600 s, E<sub>appl</sub> = 412 mV vs NHE) followed by bulk reduction (600 s, E<sub>appl</sub> = -250 mV vs NHE). Bulk oxidation and bulk reduction were performed on 20 μL of 20 nM Pol2<sub>CORE</sub>EXO<sup>-</sup> using DNA-modified electrodes; all experiments were carried out in triplicate.

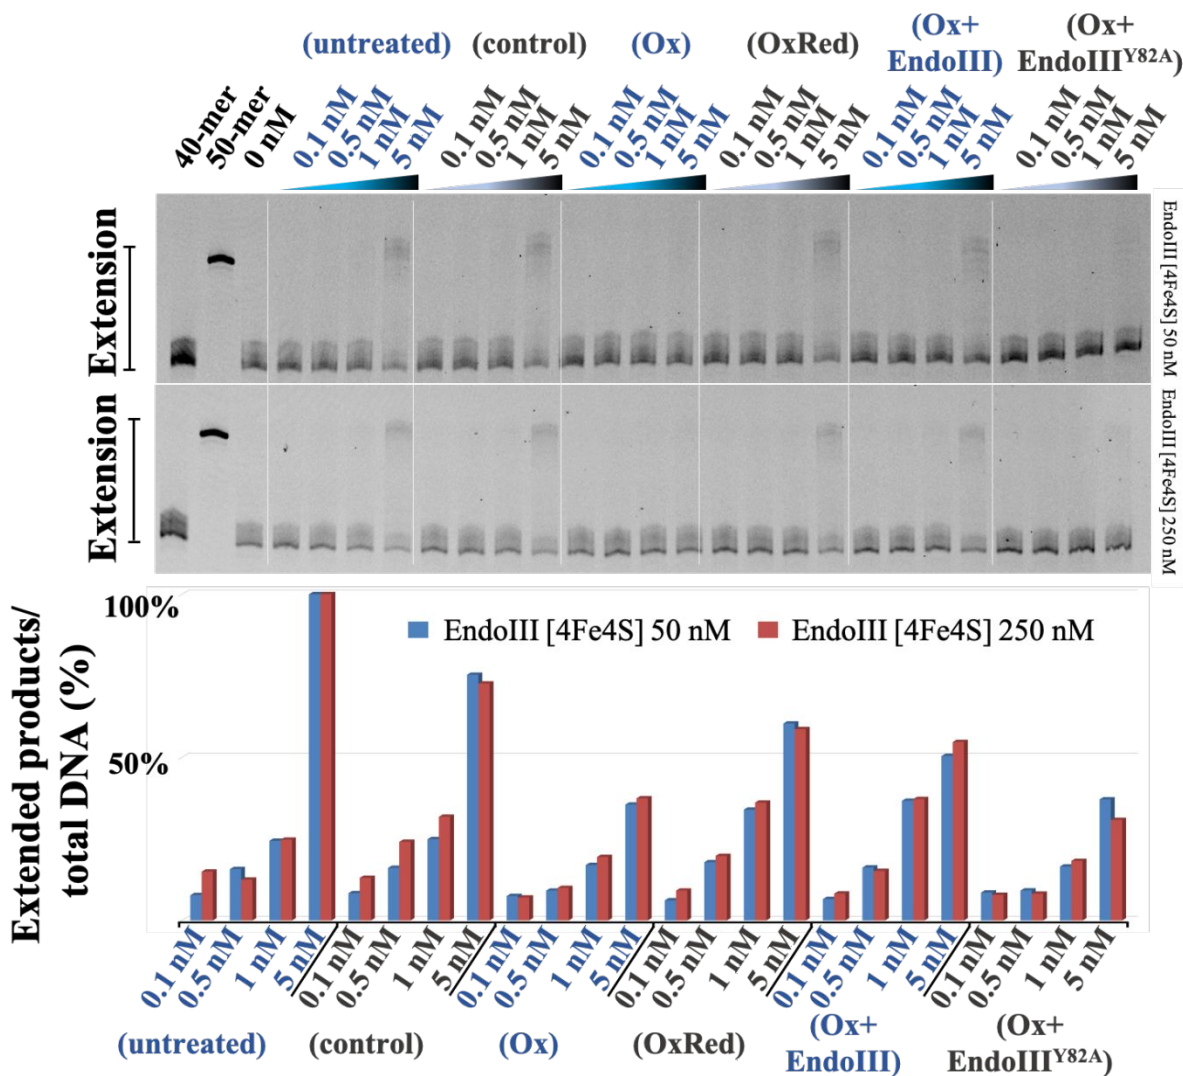

**Figure S6.** Primer extension assay investigating the effect of EndoIII and EndoIII<sup>Y82A</sup> concentration on electrochemically oxidized and inactive Ox Pol2<sub>CORE</sub>exo<sup>-</sup> using DNA-modified electrodes. (top panel) denaturing PAGE with products from Pol2<sub>CORE</sub>exo<sup>-</sup> primer extension assays using 10x (upper gel image) and 50x (lower gel image) molar excess of reduced EndoIII (with respect to [4Fe4S]) (bottom panel), respectively. Bar graph presenting the quantified products in the denaturing PAGE (top two panels). (untreated) activity of untreated Pol2<sub>CORE</sub>exo<sup>-</sup>; (control) activity of Pol2<sub>CORE</sub>exo<sup>-</sup> after incubation on DNA modified electrodes without an applied potential; (Ox) activity of Pol2<sub>CORE</sub>exo<sup>-</sup> after bulk oxidation (600 s,  $E_{\text{appl}} = 412$  mV vs NHE); (OxRed) activity of Pol2<sub>CORE</sub>exo<sup>-</sup> after bulk oxidation (600 s,  $E_{\text{appl}} = 412$  mV vs NHE) followed by bulk reduction (600 s,  $E_{\text{appl}} = -250$  mV vs NHE). (Ox+EndoIII) is the activity of oxidized Pol2<sub>CORE</sub>exo<sup>-</sup> after incubation with 10x (50 nM) or 50x (250 nM) EndoIII. (Ox+EndoIII<sup>Y82A</sup>) is the activity of oxidized Pol2<sub>CORE</sub>exo<sup>-</sup> after incubation with 10x (50 nM) or 50x (250 nM) EndoIII<sup>Y82A</sup>. It should be noted that experiments with Ox, Ox+EndoIII, and Ox+ EndoIII<sup>Y82A</sup> in both concentrations were performed the same day/time using the same oxidized Pol2<sub>CORE</sub>exo<sup>-</sup> sample. Bulk oxidation and bulk reduction were performed on 20  $\mu\text{L}$  of 20 nM Pol2<sub>CORE</sub>exo<sup>-</sup> using DNA-modified electrodes. all experiments were carried out in triplicate, error bars indicate standard deviation.

## REFERENCES

- (1) (a) Bartels, P. L.; Stodola, J. L.; Burgers, P. M. J.; Barton, J. K. A Redox Role for the [4Fe4S] Cluster of Yeast DNA Polymerase  $\delta$ . *J. Am. Chem. Soc.* **2017**, *139*, 18339 – 18348. (b) O'Brien, E.; Holt, M. E.; Thompson, M. K.; Salay, L. E.; Ehlinger, A. C.; Chazin, W. J.; Barton, J. K. The [4Fe4S] Cluster of Human DNA Primase Functions as a Redox Switch Using DNA Charge Transport. *Science* **2017**, *355*, 813. (c) O'Brien, E.; Salay, L. E.; Epum, E. A.; Friedman, K. L.; Chazin, W. J.; Barton, J. K. Yeast Require Redox Switching in DNA Primase. *Proc. Natl. Acad. Sci.* **2018**, *115*, 13186 – 13191. (d) Tse, E. C. M.; Zwang, T. J.; Barton, J. K. The Oxidation State of [4Fe4S] Clusters Modulates the DNA-Binding Affinity of DNA Repair Proteins. *J. Am. Chem. Soc.* **2017**, *139*, 12784 – 12792. (e) Grodick, M. A.; Segal, H. M.; Zwang, T. J.; Barton, J. K. DNA-Mediated Signaling by Proteins with 4Fe-4S Clusters is Necessary for Genomic Integrity. *J. Am. Chem. Soc.* **2014**, *136*, 6470 – 6478.
